# Supplementary material for: Synthesis of a stable iron(iii)–organic framework for a visible light induced simultaneous photocatalytic reduction of Cr(vi) and the degradation of organic dyes in water
Source: Royal Society of Chemistry journal article supplement (doi:10.1039/d1nj01643a), 2021-01-01
Supplement: d1nj01643a1.pdf [file d1nj01643a1.pdf]

## Supporting information

### **Synthesis of a stable iron(III)-organic framework for visible light induced simultaneous photocatalytic reduction of Cr(VI) and degradation of organic dyes in water**

A-Di Xie,<sup>a, #</sup> Ming-Gai Hu,<sup>a, #</sup> Yu-Hui Luo,<sup>a, \*</sup> Xiang-Gui Zhu,<sup>a</sup> Zhi-Hui Wang,<sup>b</sup> Wu-Yue Geng,<sup>a</sup> Hao Zhang,<sup>a</sup> Dong-En Zhang,<sup>a, \*</sup> and Hong Zhang<sup>b, \*</sup>

<sup>a</sup> School of Environmental and Chemical Engineering, Jiangsu Ocean University, Lianyungang 222000, P. R. China

<sup>b</sup> Institute of Polyoxometalate Chemistry, Department of Chemistry, Northeast Normal University, Changchun, Jilin 130024, P. R. China

<sup>#</sup> These two authors contributed equally.

\* Corresponding authors. E-mail: [luoyh@jou.edu.cn](mailto:luoyh@jou.edu.cn) (Yu-Hui Luo),  
[2007000040@jou.edu.cn](mailto:2007000040@jou.edu.cn) (Dong-En Zhang),  
[zhangh@nenu.edu.cn](mailto:zhangh@nenu.edu.cn) (Hong Zhang).

## Materials and Measurements

All reagents and solvents were purchased from commercial sources and used without further purification. Powder X-ray diffraction (PXRD) patterns were collected on a PANalytical X'Pert Powder X-ray diffractometer with graphite monochromatized Cu K $\alpha$  radiation ( $\lambda = 0.15418$  nm) and  $2\theta$  ranging from 3 to 50  $^\circ$  with an increment of 0.02  $^\circ$  and a scanning rate of 10  $^\circ$ /min. The FT-IR spectrum was measured in KBr pellets in the range 4000-400  $\text{cm}^{-1}$  on a Thermo Scientific spectrometer. The UV-Vis absorption was measured with a PERSEE UV-Vis-NIR spectrophotometer. Mott-Schottky measurements and short circuit photocurrent response was performed on a CHI660E electrochemical workstation from Shanghai Chenhua Instrument Co., Ltd. Inductively coupled plasma optical emission spectrometry (ICP-OES) were performed on an Optima 8000 from PerkinElmer. X-ray photoelectron spectroscopy (XPS) were carried out on a Nexsa<sup>TM</sup> X instrument from Thermo Scientific<sup>TM</sup>. The Brunauer-Emmett-Teller (BET) surface areas was determined by BSD-PS1 instrument from BeiShiDe Instrument technology (Beijing) Co. Ltd.

## X-ray crystallography

Crystallographic diffraction data for **JOU-22** were recorded on an Oxford Gemini S Ultra diffractometer with graphite monochromatized Cu-K $\alpha$  radiation ( $\lambda = 1.5418$  Å) at room temperature. the structure was solved by Direct Method of SHELXT-2016 and refined by full-matrix least-squares techniques by using the SHELXL-2016 program.<sup>1</sup> All nonhydrogen atoms were refined with anisotropic temperature parameters. All hydrogen atoms were placed in geometrically idealized position as a riding mode. The solvent molecules in the crystal are highly disordered and are removed by using the SQUEEZE routine of PLATON.<sup>2</sup> ISOR command was used to restrict O1W and O2 for ADP alert. The crystallographic data for **JOU-22** were summarized in Table S1, and the selected bond lengths and angles are listed in Table S2. CCDC number for **JOU-22** is 2026455.

**Table S1.** Crystal data and structure refinements for **JOU-22**.

|                     | <b>JOU-22</b>                                   |
|---------------------|-------------------------------------------------|
| Empirical formula   | C <sub>8</sub> H <sub>6</sub> O <sub>6</sub> Fe |
| Formula weight      | 253.98                                          |
| Temperature / K     | 100.00(10)                                      |
| Wavelength / Å      | 1.5418                                          |
| Crystal system      | tetragonal                                      |
| Space group         | <i>I</i> 4 <sub>1</sub> 22                      |
| <i>a</i> / Å        | 15.1494(10)                                     |
| <i>b</i> / Å        | 15.1494(10)                                     |
| <i>c</i> / Å        | 12.0558(2)                                      |
| $\alpha$ / $^\circ$ | 90                                              |
| $\beta$ / $^\circ$  | 90                                              |

|                                   |                |
|-----------------------------------|----------------|
| $\gamma / ^\circ$                 | 90             |
| Volume / $\text{\AA}^3$           | 2766.86(6)     |
| Z                                 | 8              |
| Reflns coll./unique               | 3320/          |
| $F(000)$                          | 1024.0         |
| Density / $\text{g cm}^{-3}$      | 1.570          |
| $\mu / \text{mm}^{-1}$            | 9.050          |
| $R_{\text{int}}$                  | 0.0219         |
| Goodness-of-fit on $F^2$          | 1.017          |
| $R1, wR2 [I > 2\sigma(I)]^a$      | 0.0329, 0.1021 |
| $R1, wR2$ (all data) <sup>a</sup> | 0.0339, 0.1032 |

---

<sup>a</sup> $R_1 = \sum ||F_o| - |F_c|| / \sum |F_o|$ ;  $wR_2 = \sum [w(F_o^2 - F_c^2)^2] / \sum [w(F_o^2)^2]^{1/2}$ .

**Table S2.** Selected bond lengths ( $\text{\AA}$ ) and angles ( $^\circ$ ) for **JOU-22**.<sup>a</sup>

|                                        |            |                                        |            |
|----------------------------------------|------------|----------------------------------------|------------|
| Fe1-O1 <sup>#1</sup>                   | 1.954(2)   | Fe1-O3 <sup>#2</sup>                   | 2.022(2)   |
| Fe1-O1                                 | 1.954(2)   | Fe1-O2 <sup>#1</sup>                   | 2.026(3)   |
| Fe1-O3                                 | 2.022(2)   | Fe1-O2 <sup>#3</sup>                   | 2.026(3)   |
| O3 <sup>#2</sup> -Fe1-O2 <sup>#1</sup> | 90.57(12)  | O1 <sup>#1</sup> -Fe1-O2 <sup>#1</sup> | 89.37(10)  |
| O1 <sup>#1</sup> -Fe1-O2 <sup>#3</sup> | 169.60(11) | O1-Fe1-O3 <sup>#2</sup>                | 169.66(9)  |
| O1-Fe1-O2 <sup>#3</sup>                | 89.37(10)  | O3-Fe1-O2 <sup>#1</sup>                | 90.57(14)  |
| O1 <sup>#1</sup> -Fe1-O1               | 100.91(14) | O3 <sup>#2</sup> -Fe1-O2 <sup>#3</sup> | 90.62(13)  |
| O1 <sup>#1</sup> -Fe1-O3               | 88.33(12)  | O2 <sup>#1</sup> -Fe1-O2 <sup>#3</sup> | 80.36(15)  |
| O1-Fe1-O3                              | 90.68(12)  | O3-Fe1-O2 <sup>#3</sup>                | 90.62(13)  |
| O1 <sup>#1</sup> -Fe1-O3 <sup>#2</sup> | 90.68(12)  | O3-Fe1-O3 <sup>#2</sup>                | 178.54(17) |
| O1-Fe1-O3 <sup>#2</sup>                | 88.32(12)  |                                        |            |

<sup>a</sup> Symmetry transformation used to generate equivalent atoms: #1, 0.5 - x, y, 0.25 + z; #2, 0.5 - x, 0.5 - y, 1.5 - z; #3, x, 0.5 - y, 1.25 - z.

**Table S3.** Optimization of synthesis conditions of **JOU-22** crystal.

| Ln \ HF          | 0 mg                                                                               | 43 mg                                                                                | 64 mg                                                                                 |
|------------------|------------------------------------------------------------------------------------|--------------------------------------------------------------------------------------|---------------------------------------------------------------------------------------|
| 20 $\mu\text{L}$ | 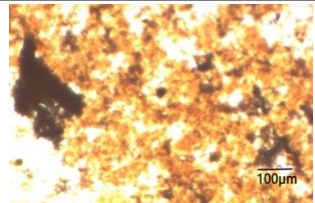  |    |    |
| 30 $\mu\text{L}$ |   |    |    |
| 40 $\mu\text{L}$ |  |   |   |
| 50 $\mu\text{L}$ |                                                                                    |  |  |

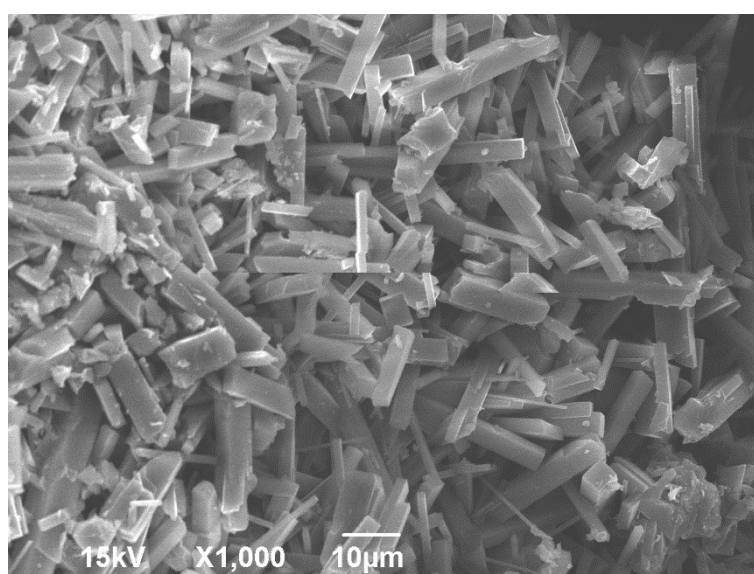

**Fig. S1.** SEM image of **JOU-22** powder. 30  $\mu\text{L}$  HF was added during synthesis process.

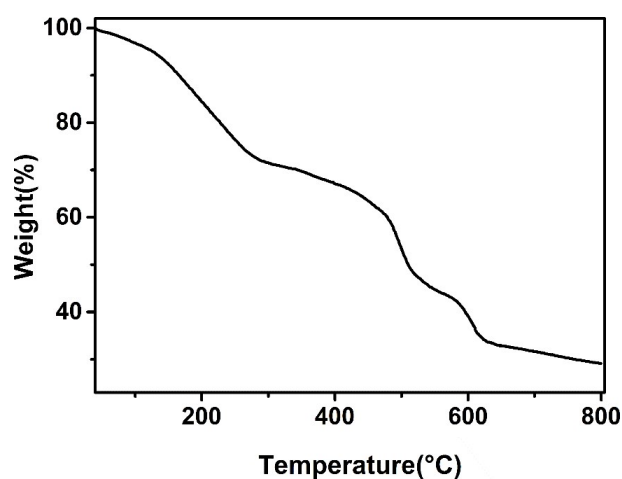

Fig. S2. TGA curve of JOU-22 crystals.

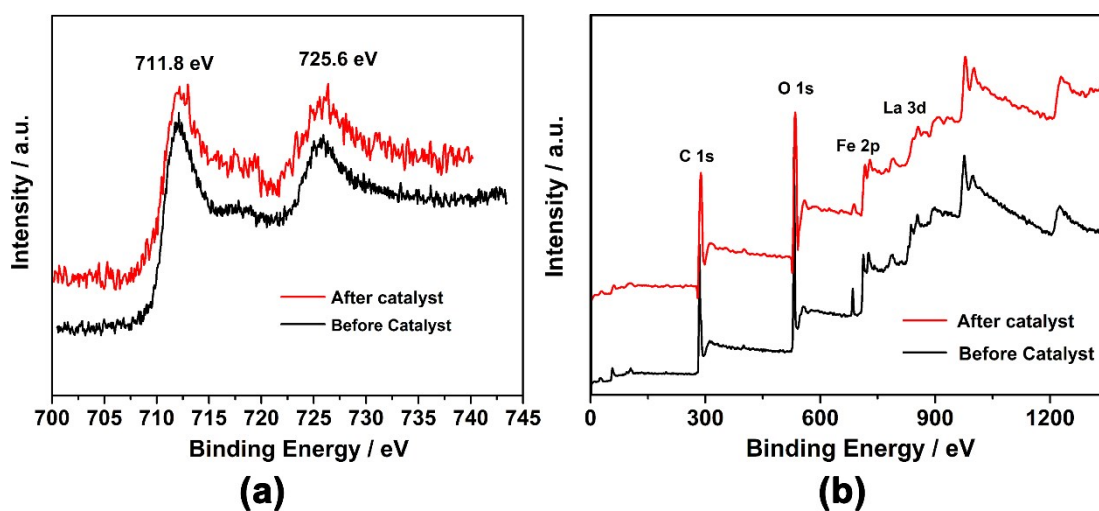

Fig. S3. (a) XPS high resolution spectra of iron in JOU-22 crystals before and after photocatalytic reaction. (b) XPS spectra of JOU-22 crystals before and after photocatalytic reaction.

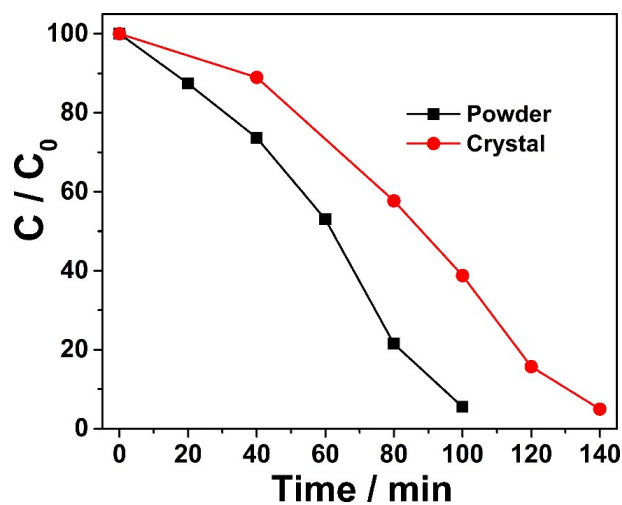

Fig. S4. Comparison of degradation efficiency of dichromate anions over JOU-22

crystals and powder.

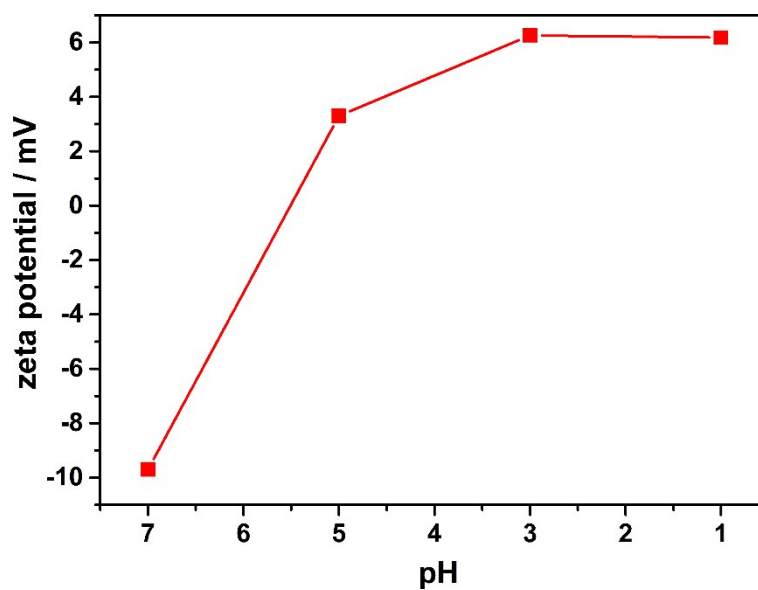

**Fig. S5.** As the proton concentration increases, the protonation of **JOU-22** makes its surface charge turn from negative to positive.

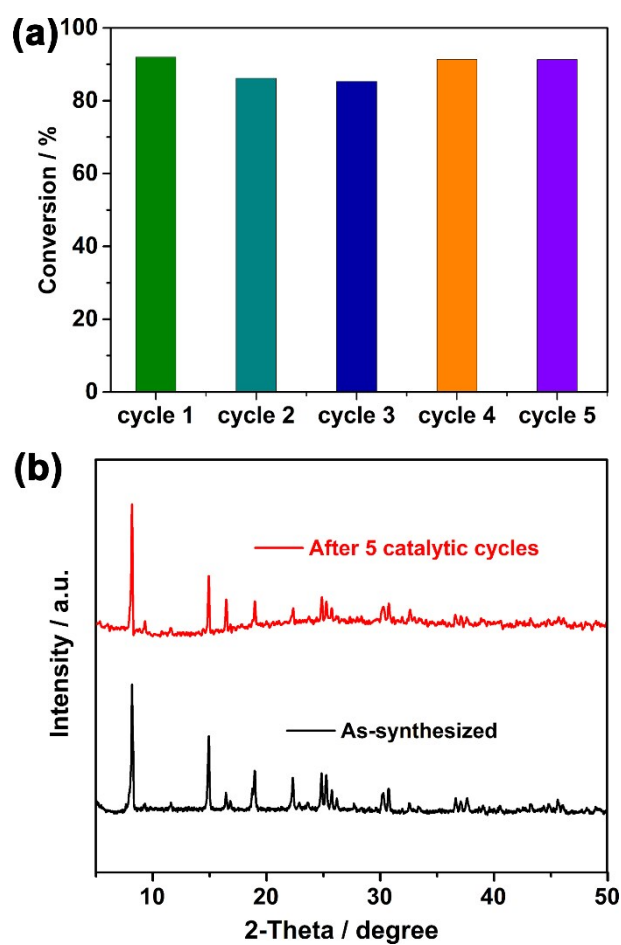

**Fig. S6.** (a) Photocatalytic activity of **JOU-22** almost unchanged over five reaction rounds. (b) PXRD pattern of **JOU-22** after five reaction rounds consists well with that

of as-synthesized samples.

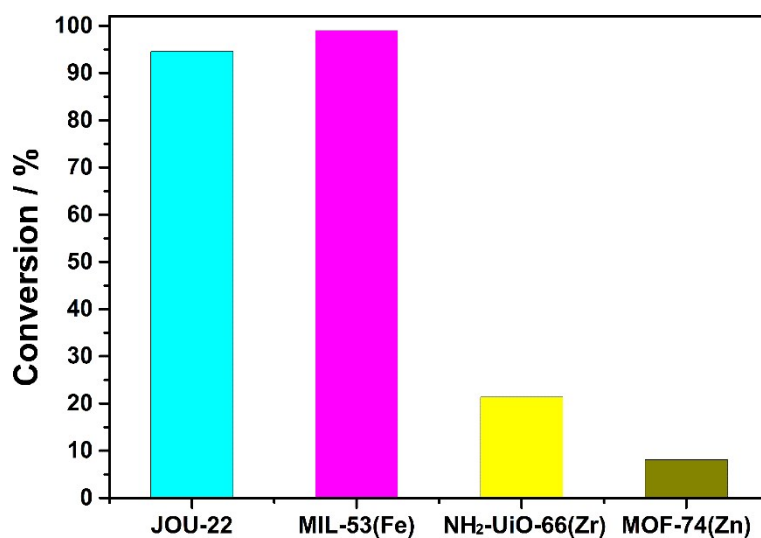

Fig. S7. Comparison of the Cr(IV) reduction rate over different MOF materials.

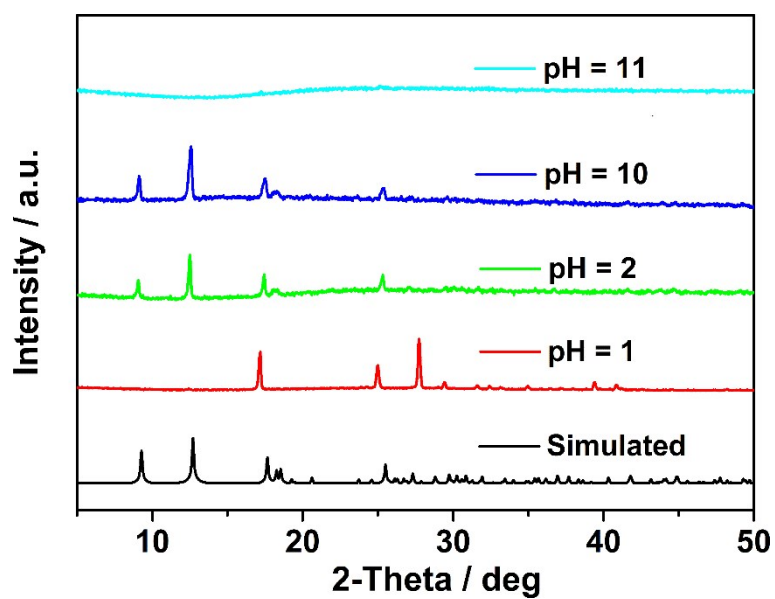

Fig. S8. MIL-53(Fe) can stable in aqueous solution with pH range from 2 - 10.

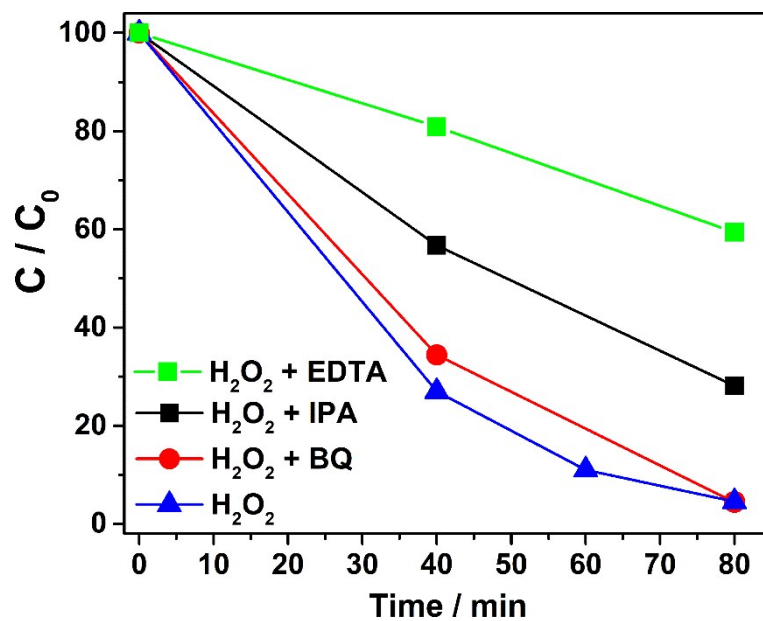

Fig. S9. Kinetics of photocatalytic MB degradation under different conditions.

### References

1. (a) G. M. Sheldrick, *Acta Crystallogr. A*, 2008, **A64**, 112-122; (b) G. M. Sheldrick, *Acta Crystallogr. C*, 2015, **C71**, 3-8.
2. A. L. Spek, *J. Appl. Crystallogr*, 2003, **36**, 7-13.
